# Supplementary material for: New growth modes of molybdenum oxide layered 1D structures using alternative catalysts: transverse mode vs. axial mode
Source: Royal Society of Chemistry journal article supplement (doi:10.1039/c4ce01869a), 2014-12-04
Supplement: c4ce01869a1.pdf [file c4ce01869a1.pdf]

## Electronic Supplementary Information (ESI)

### **New Growth Modes of Molybdenum Oxide Layered 1D Structures using Alternative Catalysts: Transverse Mode vs. Axial Mode**

Tao Sheng,<sup>a</sup> Baobao Cao,<sup>bc</sup> Yong Zhang,<sup>d</sup> and Haitao Zhang<sup>\*b</sup>

*<sup>a</sup> Department of Physics and Optical Science, and Optical Science and Engineering Program, The University of North Carolina at Charlotte, 9201 University City Boulevard, Charlotte, NC 28223, USA*

*<sup>b</sup> Department of Mechanical Engineering and Engineering Science, The University of North Carolina at Charlotte, 9201 University City Boulevard, Charlotte, NC 28223, USA*

*<sup>c</sup> School of Materials Science and Engineering, Southwest Jiaotong University, No. 111, North 1st Section of Second Ring Road, Chengdu, Sichuan 610031, P.R. China*

*<sup>d</sup> Department of Electrical and Computer Engineering, The University of North Carolina at Charlotte, 9201 University City Boulevard, Charlotte, NC 28223, USA*

Email address: hzhang3@uncc.edu

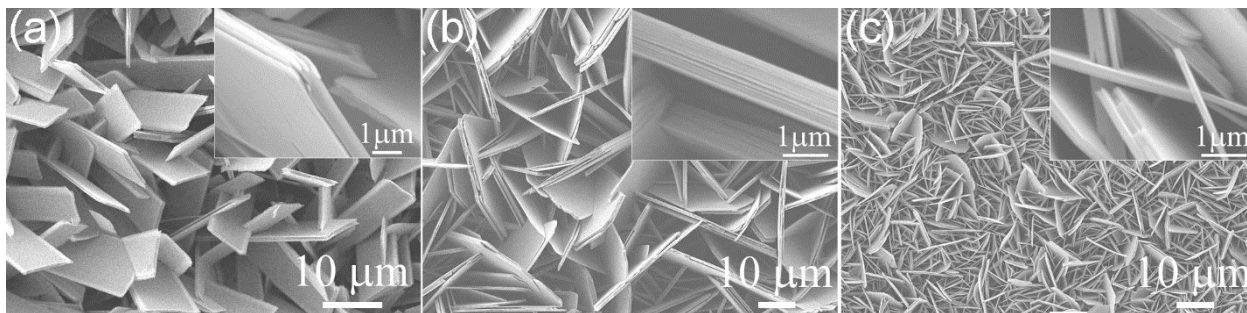

**Fig. S1** SEM images of the MoO<sub>3</sub> nanoplates grown without any catalysts at different substrate temperatures: (a) 490 °C, (b) 445 °C, and (c) 340 °C.

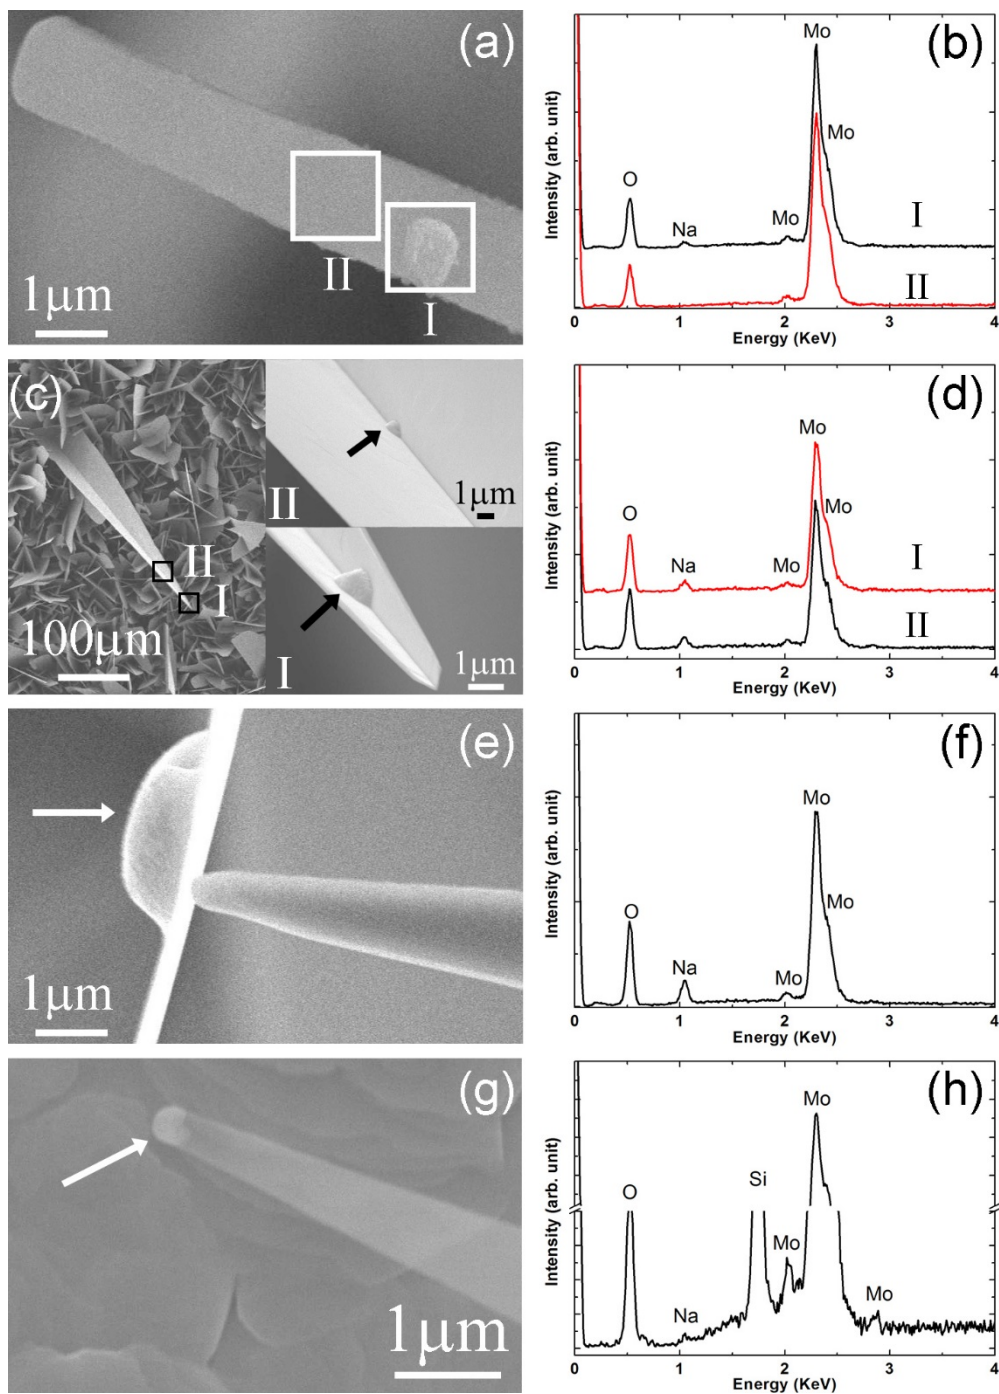

**Fig. S2** SEM images and EDS spectra identifying the location, morphology, and composition of the catalyst particles on the nanobelt structures: (a-b) a catalyst particle (I) in the middle of a nanobelt (II), (c-d) two catalyst particles (I and II) leading the growth of two perpendicular nanobelts, (e-f) a catalyst particle in the middle of a nanobelt, and (g-h) a catalyst particle on the side surface of a nanobelt tip.

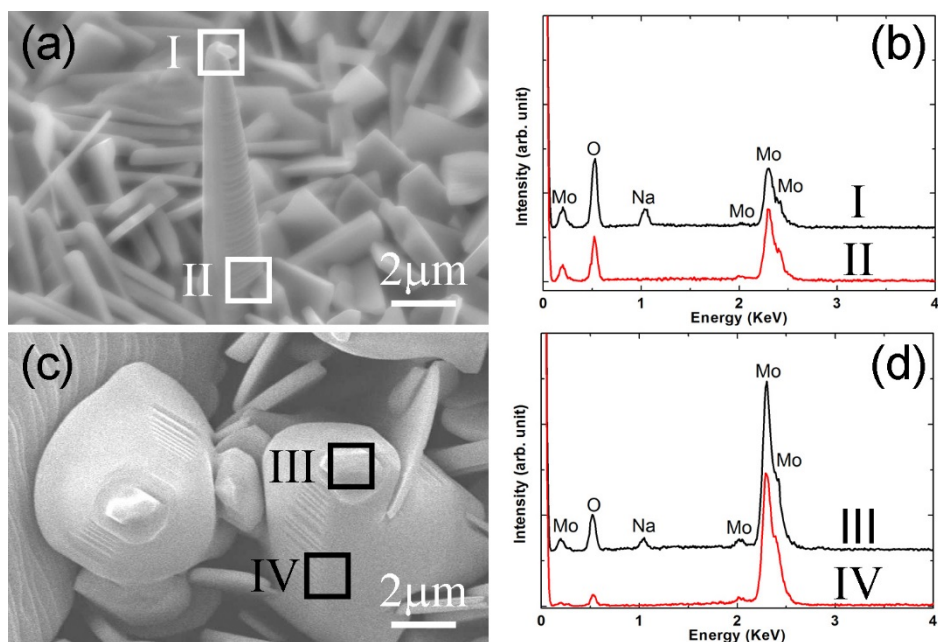

**Fig. S3** SEM images and EDS spectra for identifying the location, morphology, and composition of the catalysts on the microtower structures: (a-b) a tiny catalyst particle (I) on top of a small cone shaped microtower (II), and (c-d) a catalyst particle (III) on a large and short microtower (IV).

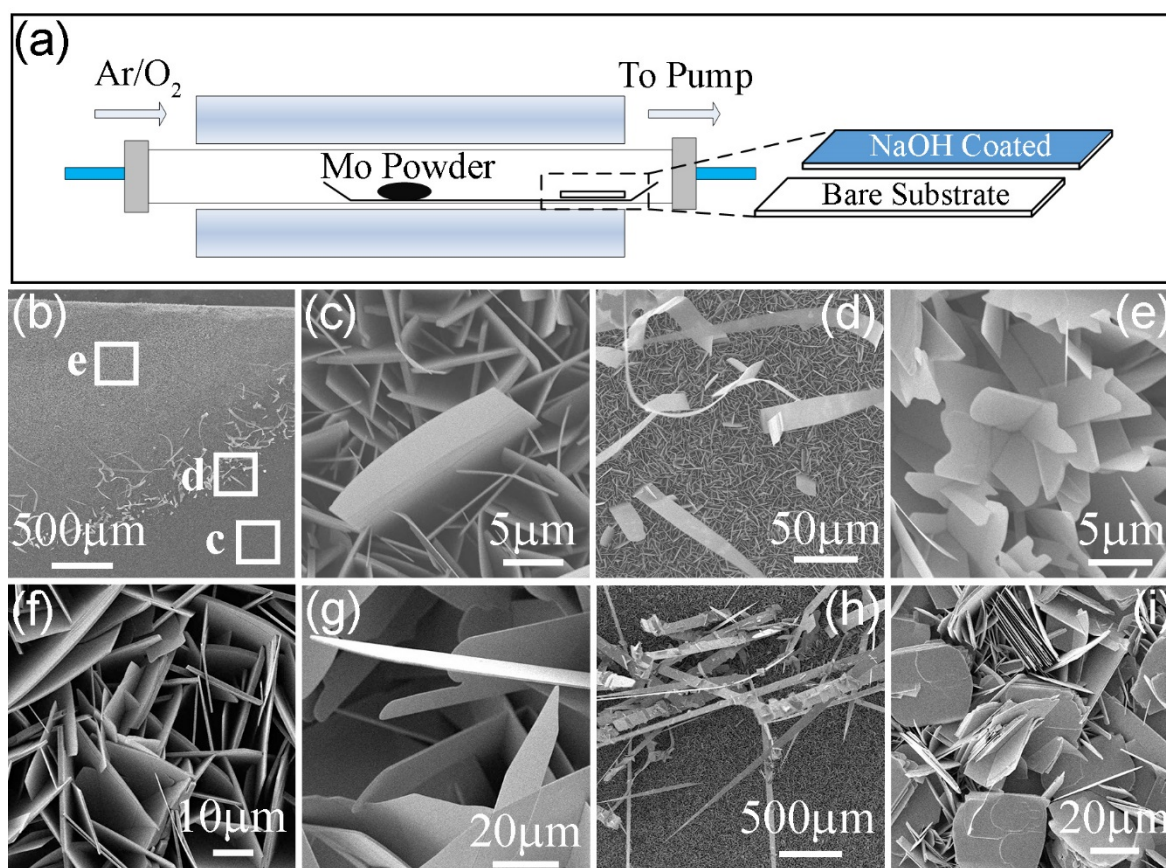

**Fig. S4** "Side-by-side" growth proving the vapor-phase transport of catalysts during the growth. (a) Schematic drawing of the "side-by-side" growth with one NaOH catalysts treated substrate and one bare substrate without catalysts. SEM images of the growth on the untreated substrates at different growth times: (b-e) 30 min and (f-i) 120 min. For 30 min growth: (b) low magnification SEM image showing labeled growth areas with different morphologies, (c) rectangular nanoplates grown without catalysts, (d) nanobelts grown with catalysts, and (e) forked nanoplates grown with catalysts. For 120 min growth: (f) rectangular nanoplates without catalysts, (g) forked nanoplates with catalysts, (h) microbelts with catalysts, and (i) microtowers with catalysts.

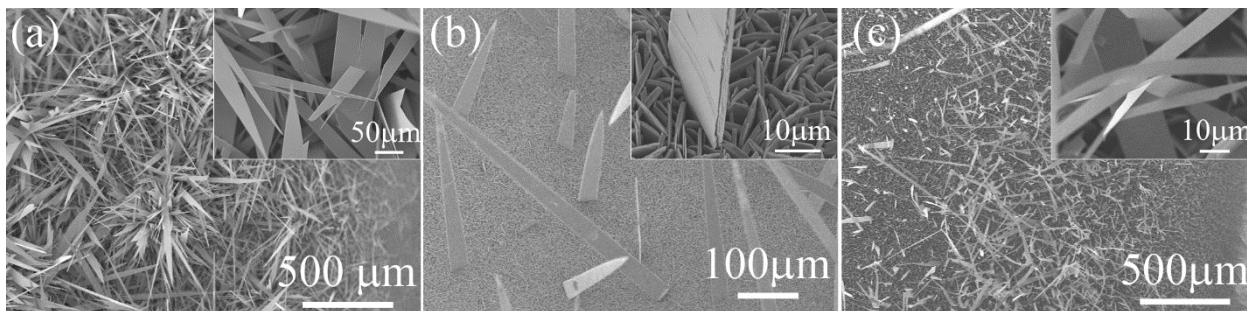

**Fig. S5** SEM images of selected  $\text{MoO}_3$  1D structures: (a) forked nanoplates grown with  $\text{Na}_2\text{CO}_3$ , (b) triangular microbelts grown on glass, and (c) nanobelts and microbelts grown on mica.

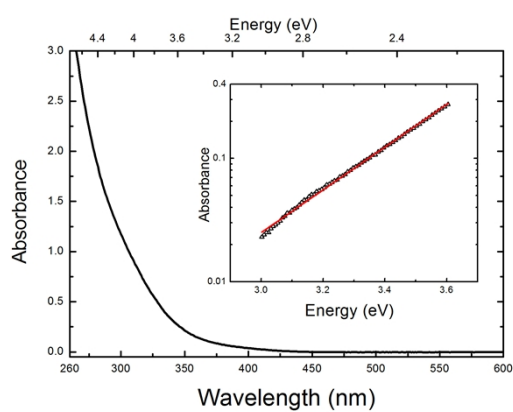

**Fig. S6** Absorption spectrum of  $\text{MoO}_3$  deposition. The inset shows the linear fitting of the absorbance at the absorption edge plotted logarithmically as a function of photon energy.

**Table S1** Matching and comparison of Raman peaks (frequency,  $\text{cm}^{-1}$ ) of sodium molybdates and molybdenum oxide with reported literatures.

| $\text{Na}_2\text{Mo}_2\text{O}_7$ |                                 |              | $\text{Na}_2\text{Mo}_4\text{O}_{13}$ |                           |              | $\text{MoO}_3$   |                         |                               |              |
|------------------------------------|---------------------------------|--------------|---------------------------------------|---------------------------|--------------|------------------|-------------------------|-------------------------------|--------------|
| Saraiva et al. <sup>1</sup>        | Fomichev et al. <sup>2 a)</sup> | Present work | Fomichev et al. <sup>2</sup>          | Schofield <sup>3 b)</sup> | Present work | Eda <sup>4</sup> | Chu et al. <sup>5</sup> | Siciliano et al. <sup>6</sup> | Present Work |
| 939                                | 939/935                         | 937          |                                       | 995                       | 995          | 995              | 996                     | 996                           | 996          |
| 921                                | 920/918                         | 919          | 970                                   | 971                       | 970          | 819              | 819                     | 819                           | 820          |
| 873                                | 875/869                         | 873          | 960                                   | 963                       | 962          | 666              | 666                     | 666                           | 667          |
| 833                                | 836/828                         | 833          | 940                                   |                           |              | 471              | 473                     |                               |              |
| 821                                | 818/815                         |              | 925                                   |                           | 926          | 378              | 378                     | 379                           | 380          |
| 768                                | 774/765                         |              | 910                                   | 918                       | 915          | 366              | 365                     | 365                           | 364          |
| 741                                | 741/739                         |              | 895                                   | 899                       | 898          | 338              | 337                     | 336                           | 338          |
| 524                                | 526/525                         |              | 870                                   |                           |              | 291              | 291                     |                               | 291          |
| 467                                | 464/460                         |              | 835                                   | 841                       | 841          | 283              | 283                     | 284                           | 284          |
| 413                                | 411/411                         |              |                                       | 820                       | 819          | 246              | 244                     | 246                           | 245          |
| 369                                | 369/368                         | 366          | 745                                   |                           |              | 217              | 218                     | 216                           | 216          |
| 339                                | 340/336                         | 340          | 650                                   | 666                       |              | 197              | 197                     | 198                           | 199          |
| 295                                | 296/294                         |              |                                       | 620                       | 619          | 159              | 158                     | 158                           | 156          |
| 249                                | 245/245                         |              | 438                                   |                           |              | 129              | 129                     | 129                           |              |
| 226                                | 228/227                         | 226          |                                       |                           | 417          | 117              | 117                     | 115                           |              |
|                                    | 215/215                         |              | 405                                   |                           |              | 100              | 98                      |                               |              |
| 200                                | 199/199                         | 198          |                                       | 396                       | 393          | 84               | 84                      | 82                            |              |
| 176                                |                                 |              | 382                                   | 381                       |              |                  |                         |                               |              |
| 137                                | 140/138                         |              |                                       | 368                       |              |                  |                         |                               |              |
| 120                                | 120/120                         |              | 348                                   |                           |              |                  |                         |                               |              |
| 84                                 | 84/84                           |              | 335                                   | 339                       | 336          |                  |                         |                               |              |
|                                    | 45/44                           |              | 320                                   | 320                       | 318          |                  |                         |                               |              |
| 36                                 |                                 |              | 295                                   | 293                       |              |                  |                         |                               |              |
|                                    |                                 |              | 272                                   |                           | 267          |                  |                         |                               |              |
|                                    |                                 |              | 255                                   |                           |              |                  |                         |                               |              |
|                                    |                                 |              |                                       | 246                       |              |                  |                         |                               |              |
|                                    |                                 |              | 220                                   | 225                       | 224          |                  |                         |                               |              |
|                                    |                                 |              |                                       | 202                       |              |                  |                         |                               |              |
|                                    |                                 |              |                                       | 159                       | 155          |                  |                         |                               |              |
|                                    |                                 |              |                                       | 131                       |              |                  |                         |                               |              |
|                                    |                                 |              |                                       | 119                       |              |                  |                         |                               |              |

a) For  $^{92}\text{Mo}/^{100}\text{Mo}$  respectively; b) Read from the figure.

1. G. D. Saraiva, W. Paraguassu, M. Maczka, P. T. C. Freire, F. F. de Sousa and J. Mendes Filho, *Journal of Raman Spectroscopy*, 2011, **42**, 1114-1119.
2. V. V. Fomichev, M. E. Poloznikova and O. I. Kondratov, *Russian Chemical Reviews*, 1992, **61**, 877.
3. K. Schofield, *Energy & Fuels*, 2005, **19**, 1898-1905.
4. K. Eda, *Journal of Solid State Chemistry*, 1991, **95**, 64-73.
5. W. G. Chu, L. N. Zhang, H. F. Wang, Z. H. Han, D. Han, Q. Q. Li and S. S. Fan, 2007, **22**.
6. T. Siciliano, a. Tepore, E. Filippo, G. Micocci and M. Tepore, *Materials Chemistry and Physics*, 2009, **114**, 687-691.
